# Supplementary material
Source: PubMed Central journal article supplement (PMC6125250)
Supplement: NIHMS981220-supplement-table.pdf [file NIHMS981220-supplement-table.pdf]

|                      | <i>Greek NSCLC Cohort</i> |
|----------------------|---------------------------|
| <b>PD-L1 mRNA</b>    | <b>HR</b>                 |
| <b>Histology</b>     |                           |
| Adeno vs squamous    | 1.03                      |
| <b>Stage</b>         |                           |
| 1-2 vs 3-4           | 0.499                     |
| <b>TILS</b>          |                           |
| 0-1 vs 2-3           | 1.085                     |
| PD-L1 pos vs neg     | 0.791                     |
| <b>PD-L1 protein</b> |                           |
| <b>Histology</b>     |                           |
| Adeno vs squamous    | 0.943                     |
| <b>Stage</b>         |                           |
| 1-2 vs 3-4           | 0.5                       |
| <b>TILs</b>          |                           |
| 0-1 vs 2-3           | 1.17                      |
| PD-L1 pos vs neg     | 0.62                      |

Table S1. Multivariate Cox proportional hazard model

|               | <i>P value</i>  |
|---------------|-----------------|
| <b>95% CI</b> |                 |
| 0.715-1.484   | .874            |
| 0.343-0.725   | <b>&lt;.001</b> |
| 0.739-1.591   | .678            |
| 0.547-1.145   | <b>.214</b>     |
|               |                 |
| 0.656-1.358   | .754            |
| 0.33-0.731    | <b>&lt;.001</b> |
| 0.794-1.73    | .425            |
| 0.381-1.00    | <b>.05</b>      |

odel of PD-L1 protein and mRNA s

| <b><i>Yale NSCLC Cohort</i></b> |               |
|---------------------------------|---------------|
| <b>HR</b>                       | <b>95% CI</b> |
| 0.666                           | 0.334-1.329   |
| 0.269                           | 0.151-0.479   |
| 0.865                           | 0.423-1.766   |
| 0.301                           | 0.154-0.589   |
| 1.03                            | 0.74-1.45     |
| 0.257                           | 0.16-0.413    |
| 0.826                           | 0.527-1.293   |
| 0.631                           | 0.384-1.035   |

status in the Greek and Yale NSCLC cohorts.

*P value*

.589

**<.001**

.69

**<.001**

.837

**<.001**

.4

.06
