# Supplementary material
Source: PubMed Central journal article supplement (PMC6125250)

**A** CK mask/UbC mRNA

## CK mask/PD-L1 mRNA

FFPE human placenta

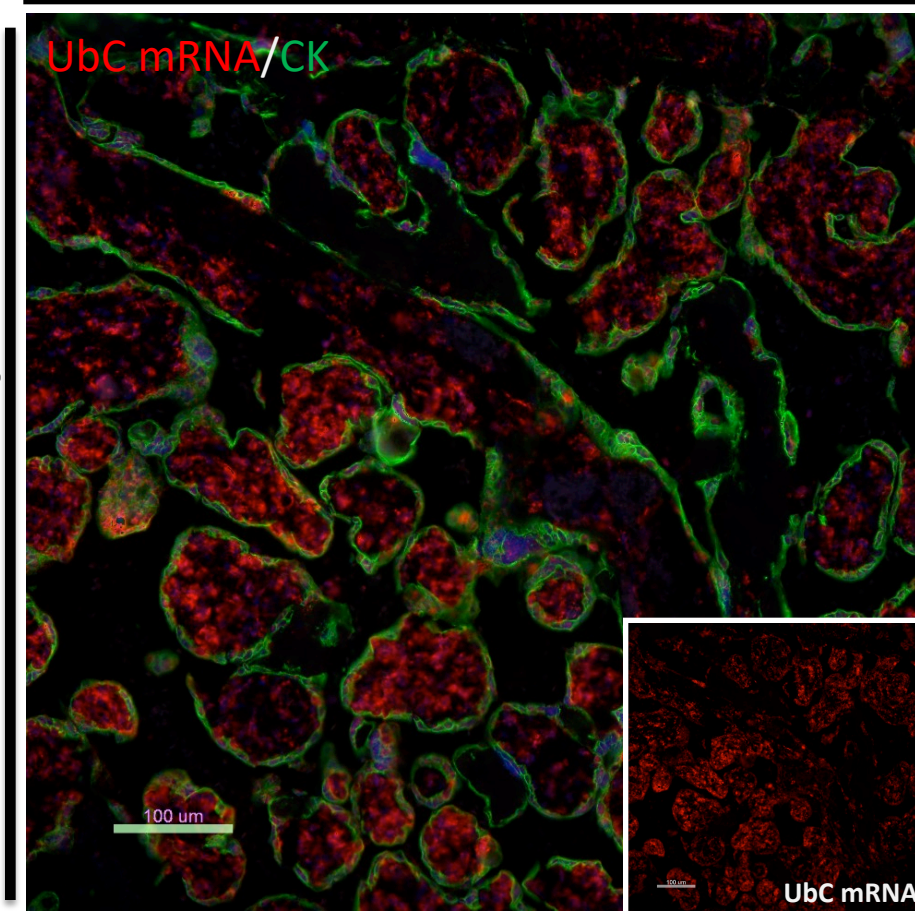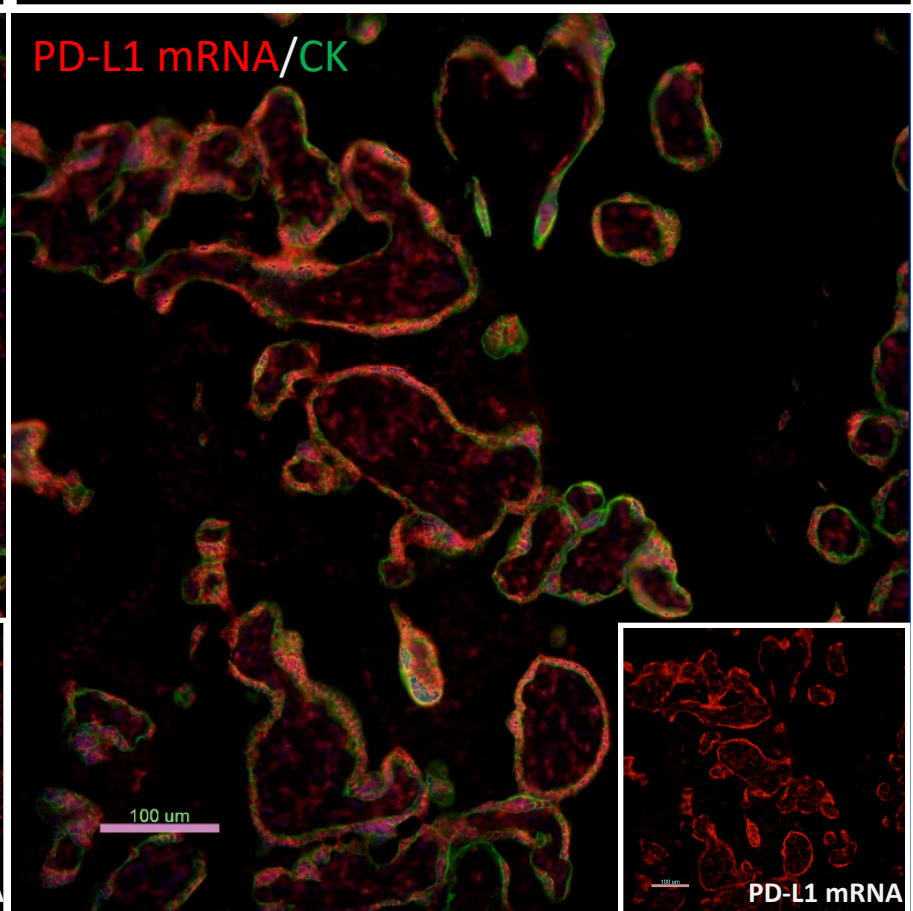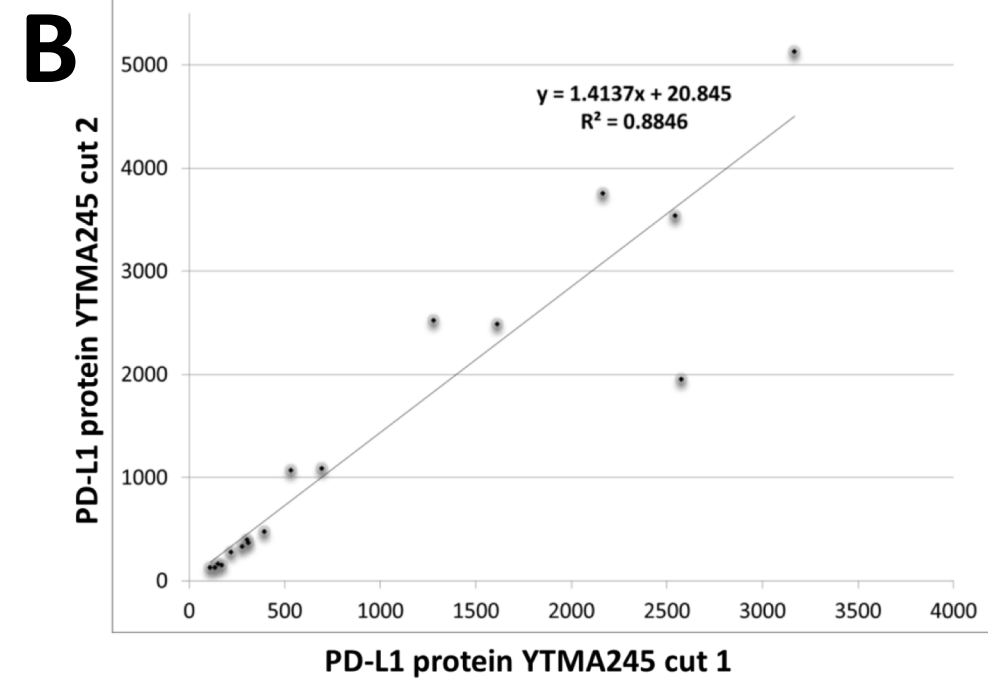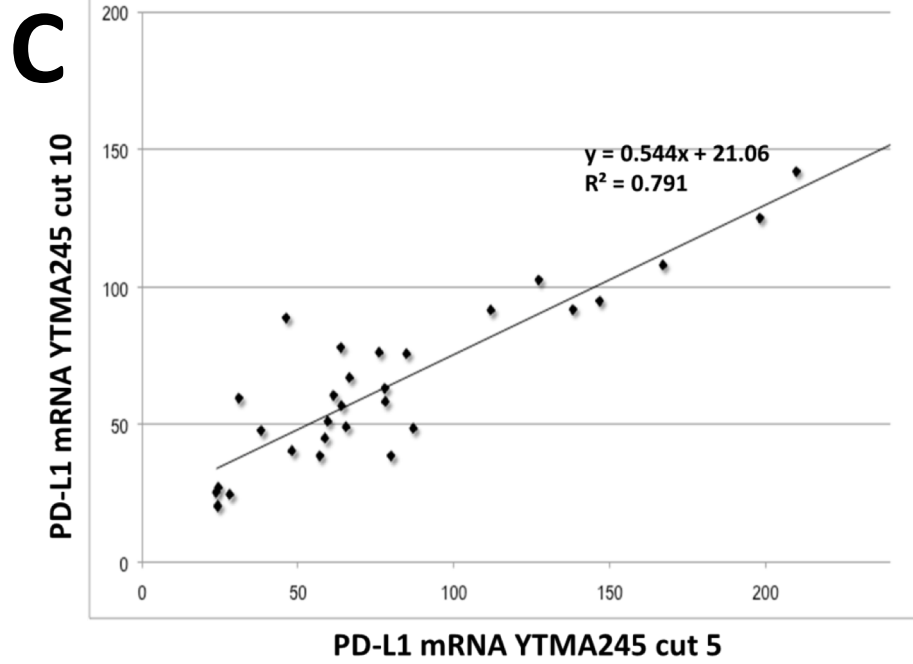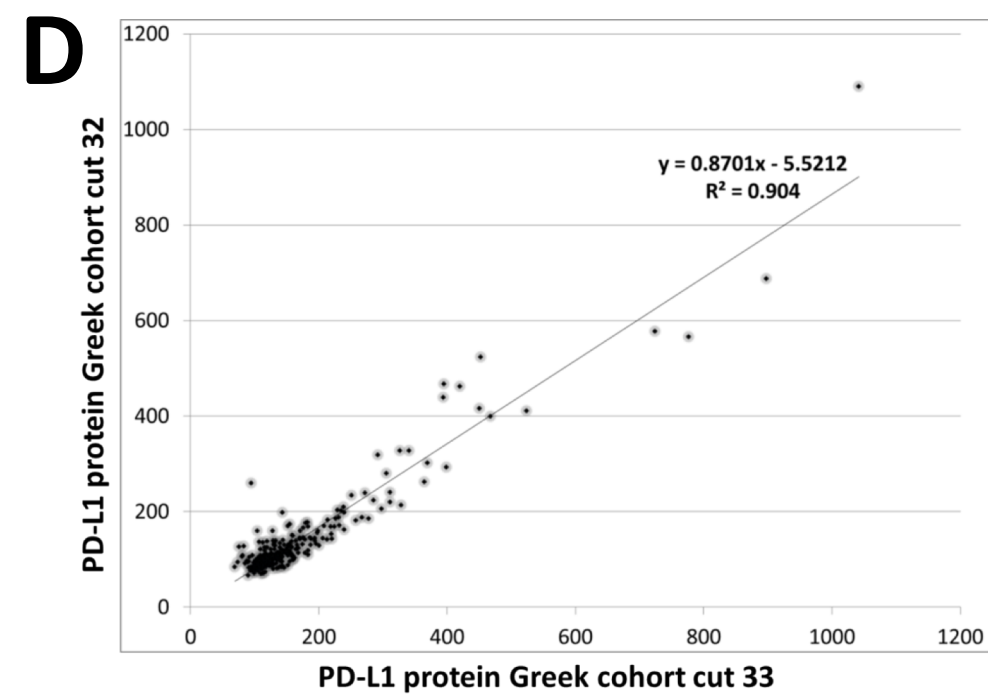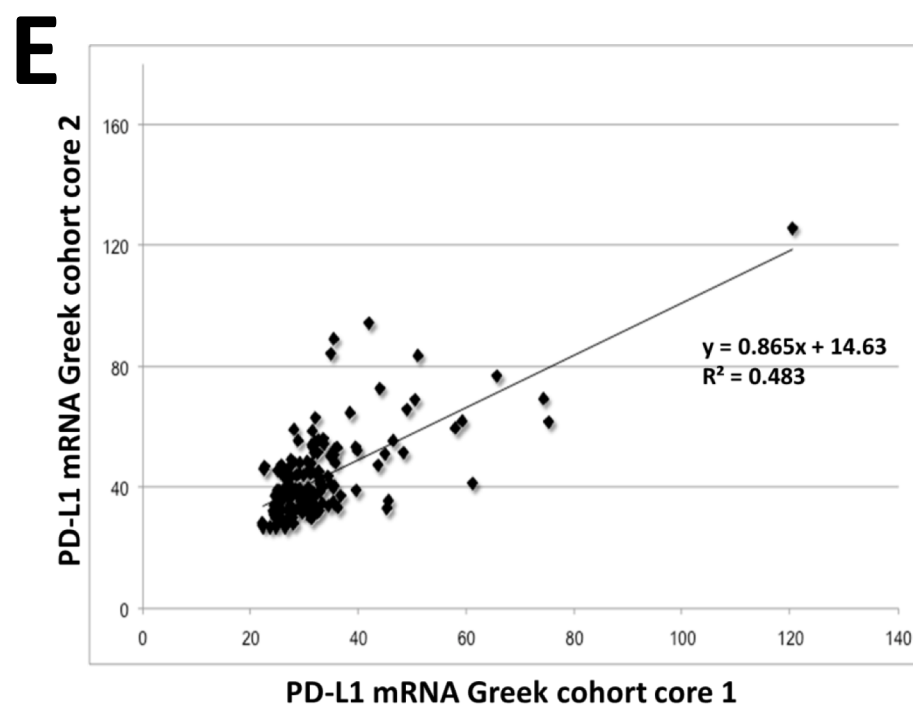

Supplement: NIHMS981220-supplement-figure.pdf [file NIHMS981220-supplement-figure.pdf]
